# Supplementary material
Source: PubMed Central journal article supplement (PMC4487243)
Supplement: Supp_Fig1.pdf [file Supp_Fig1.pdf]

## Supplementary Data

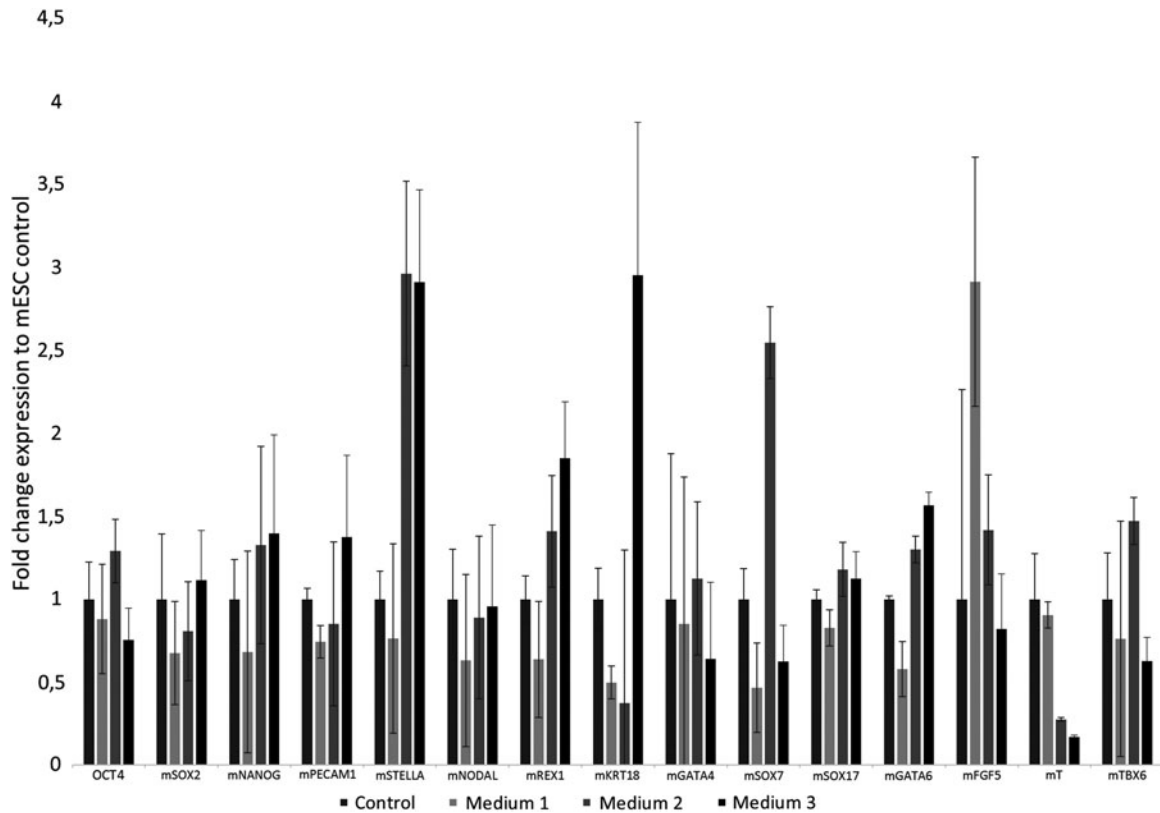

**SUPPLEMENTARY FIG. S1.** Fold change expression ( $\pm$ SD) of OCT4, SOX2, NANOG, PECAM1, STELLA, NODAL, REX1, KRT18, GATA4, SOX7, SOX17, GATA6, FGF5, T, and TBX6 in mESCs cultured for four passages in different media compared to control mESCs.
